# Supplementary material
Source: PubMed Central journal article supplement (PMC3710539)
Supplement: NIHMS472486-supplement-2.pdf [file NIHMS472486-supplement-2.pdf]

## SUPPLEMENTARY FIGURE LEGENDS

**Figure S1. Proliferation and apoptosis of tumor cells was not significantly changed in WT versus Ron TK<sup>-/-</sup> hosts.** **A.** Representative images showing immunohistochemical analysis of phospho-histone H3 protein in tumors growing in WT or Ron TK<sup>-/-</sup> hosts, with quantification on the right. **B.** Representative images showing immunofluorescence analysis of TUNEL staining in tumors growing in WT or Ron TK<sup>-/-</sup> hosts, with quantification on the right. **C.** Representative images of PyMT-MSP, 96 hours following i.v injection, showing Dil labeled tumor cells (**top**) in the lungs of WT or Ron TK<sup>-/-</sup> hosts and subsequent Image J image modification for analysis (**bottom**). **D.** Representative flow cytometric analysis **E.** Representative images of PyMT-MSP 10 days following i.v injection, showing Dil labeled tumor cells (**top**) in the lungs of WT or Ron TK<sup>-/-</sup> hosts and subsequent Image J modification for analysis (**bottom**). Data are depicted as mean $\pm$  s.e.m. N.S (not statistically significant).

**Figure S2. Loss of host Ron signaling attenuates growth of seeded micro-metastasis to overt metastasis in a tumor derived MSP-independent manner.**

**A.** Representative flow cytometric analysis (**left**) and quantification (**right**) of Dil labeled tumor cells in lung 96 hours following intravenous PyMT-MIG tumor cell injection into WT or Ron TK<sup>-/-</sup> hosts (n=7 and 5 respectively)\*. **B.** Representative flow cytometric analysis (**left**) and quantification (**right**) of Dil labeled tumor cells in lung 10 day following intravenous LAP control lung cancer line injection into WT or Ron TK<sup>-/-</sup> hosts (n=5)\*\*. **C.** Representative flow cytometric analysis of CD11b<sup>+</sup> macrophages

expressing IL-12 isolated from lungs of WT and Ron TK<sup>-/-</sup> hosts 72 hours after i.v PyMT-MSP injection. **D.** Representative flow cytometric analysis of CD11b<sup>+</sup> macrophages expressing TNF $\alpha$  isolated from lungs of WT and Ron TK<sup>-/-</sup> hosts 72 hours after i.v PyMT-MSP injection. Data are depicted as mean  $\pm$  s.e.m. \*p<0.05 (unpaired, two-sided t-test); \*\*p<0.0002 Mann Whitney test.

**Figure S3. Most splenic immune cells are present in similar proportions in tumor-bearing mice WT and Ron TK<sup>-/-</sup> hosts. A-F.** Flow cytometric analysis of macrophages (**A**), granulocytes (**B**), myeloid-derived suppressor cells (**C**), dendritic cells (**D**), CD4<sup>+</sup> T cells (**E**), and regulatory T cells (**F**). Data are represented as mean $\pm$  s.e.m to the right of each plot (n=5 per group). N.S (not statistically significant).

**Figure S4. Immunodepletion of CD8<sup>+</sup> T cells following injection of anti-CD8 antibody.** Flow cytometric analysis of CD8<sup>+</sup> T cells in spleens (**A**), lung (**B**) and peripheral blood (**C**) of anti-CD8 antibody or control (IgG) antibody injected mice. **D.** Representative images of lung colonization in Ron TK<sup>-/-</sup> hosts that have been treated with control antibody (**left**) and anti-CD8 antibody (**right**), with the image J quantification on the bottom. **E.** Representative images of lung colonization in *Prkdc<sup>scid</sup>* hosts that have been injected with CD8<sup>+</sup> T cells from WT or Ron TK<sup>-/-</sup> hosts.

**Figure S5. Treatment with a Ron inhibitor, BMS-777607, reduces metastatic outgrowth. A.** Immunoblots (**upper**) and densitometric analysis (**lower**) using the indicated antibodies on MMTV-PyMT tumor cells (as a source of murine Ron) treated with increasing concentrations of BMS-777607 for 60 minutes. Data were calculated as

ratio of phosphor-Ron to total Ron. **B.** Representative images of metastatic burden in WT hosts that have been treated with vehicle or BMS-777607. **C.** Representative flow cytometric analysis of CD11b<sup>+</sup> macrophages expressing TNF $\alpha$  , isolated from the lungs of tumor bearing WT and Ron TK<sup>-/-</sup> hosts treated with vehicle only versus BMS-777607 96 hours after i.v PyMT-MSP injection. **D.** Representative flow cytometric analysis of labeled tumor cells 96 hours after intravenous tumor cell injection in animals treated with vehicle or BMS-777607 following depletion with an anti-CD8 antibody or IgG control. (n=3-4 per group).
